# Supplementary material for: Amorphization of Ethenzamide and Ethenzamide Cocrystals—A Case Study of Single and Binary Systems Forming Low-Melting Eutectic Phases Loaded on/in Silica Gel
Source: MDPI journal article supplement (doi:10.3390/pharmaceutics15041234), 2023-04-13
Supplement: s1 [file s1]

## Supplementary Materials

### **Amorphization of enthenzamide And Enthenzamide Cocrystals —A Case Study Of Single And Binary Systems Forming Low-Melting Eutectic Phases Loaded On/In Silica Gel**

Katarzyna Trzeciak, Ewelina Wielgus, Sławomir Kaźmierski, Tomasz Pawlak  
and Marek J. Potrzebowski\*.

Centre of Molecular and Macromolecular Studies Polish Academy of Sciences, Sienkiewicza 112, 90-363 Lodz, Poland

\*Corresponding author: [marek.potrzebowski@cbmm.lodz.pl](mailto:marek.potrzebowski@cbmm.lodz.pl)

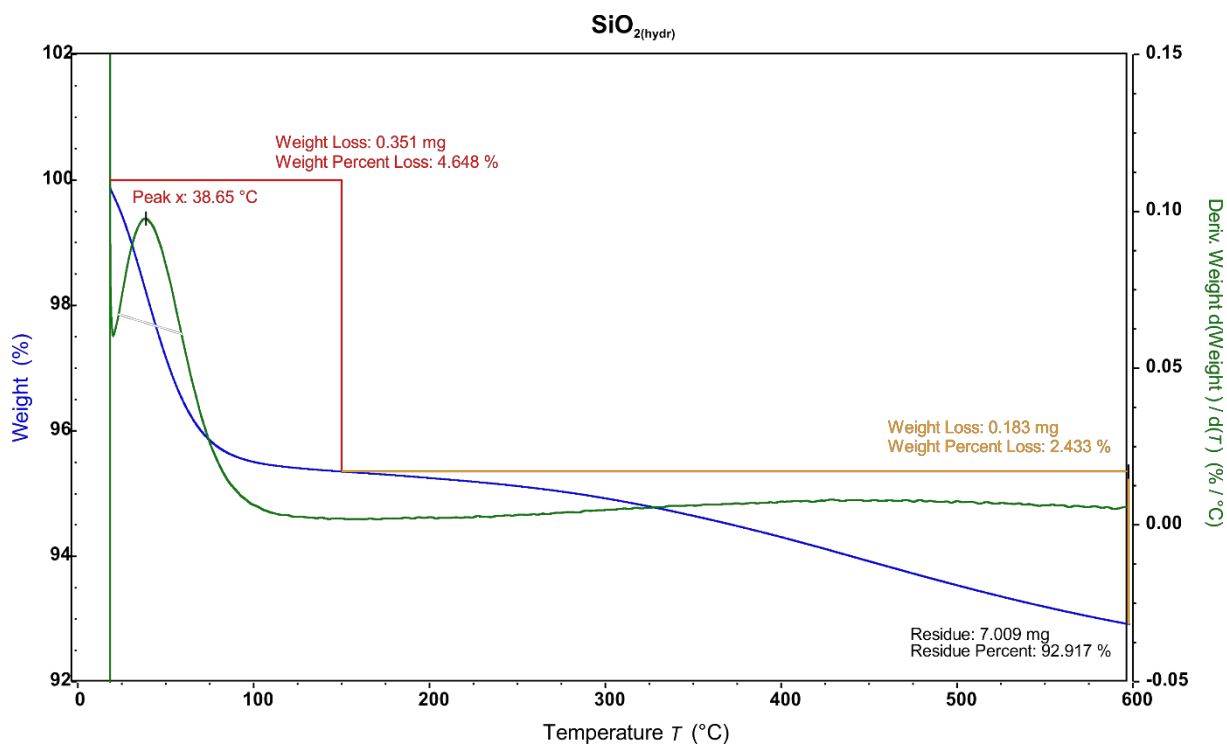

**Figure S1.** TGA curve of  $\text{SiO}_2(\text{hydr})$ .

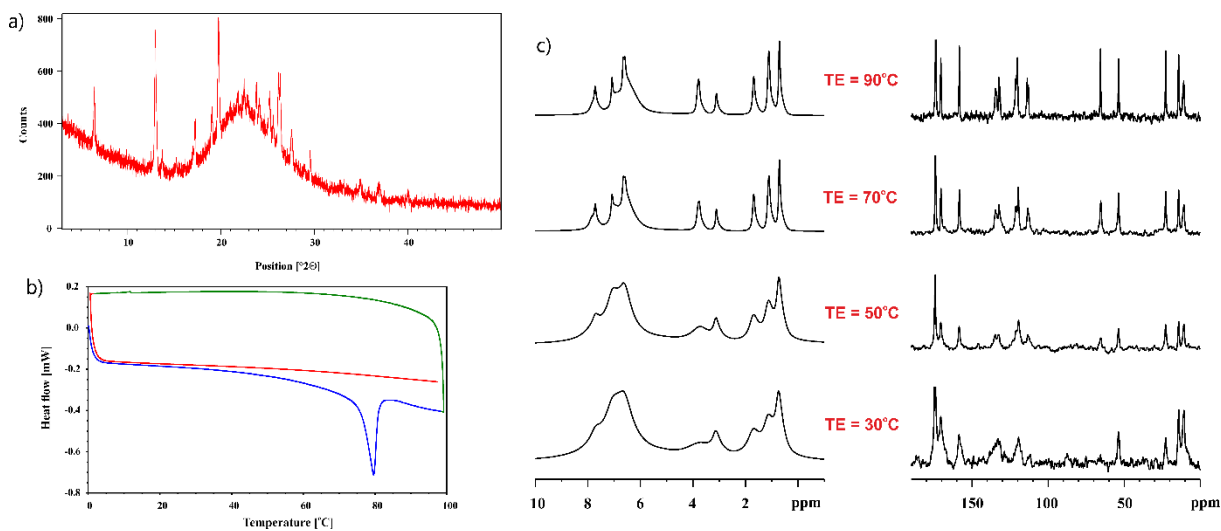

**Figure S2.** (a) PXRD recorded on a PANalytical 3 kW system in Bragg Brentano geometry and with a  $\text{Cu K}\alpha$  ( $\lambda = 1.5425 \text{ \AA}$ ) source, (b) The DSC measurement. The first heating run from 0  $^{\circ}\text{C}$  to 100  $^{\circ}\text{C}$  (blue line), then a cooling run from 100  $^{\circ}\text{C}$  to 0  $^{\circ}\text{C}$  (green line), followed by a second heating run from 0  $^{\circ}\text{C}$  to 100  $^{\circ}\text{C}$  (red line), (c) VT NMR data  $^1\text{H}$  MAS (left column) and  $^{13}\text{C}$  CP MAS (right column) recorded with spinning rate of 12 kHz for a physical mixture of ET:EMA/ $\text{SiO}_2(\text{hydr})$ .

**Table S1.** Cumulative release (%) of ET for all analyzed samples (water, pH 5.7).

|            | ET                     | ET:GLU | ET:EMA | ET:SiO <sub>2</sub> /MM | ET:GLU/SiO <sub>2</sub> /MM | ET:EMA/SiO <sub>2</sub> /MM |
|------------|------------------------|--------|--------|-------------------------|-----------------------------|-----------------------------|
| Time (min) | Cumulative release (%) |        |        |                         |                             |                             |
| 0          | 0                      | 0      | 0      | 0                       | 0                           | 0                           |
| 1          | 1.28                   | 5.16   | 3.63   | 2.56                    | 7.84                        | 8.50                        |
| 2          | 7.05                   | 12.26  | 5.89   | 35.90                   | 26.15                       | 49.68                       |
| 4          | 23.73                  | 25.83  | 10.47  | 73.12                   | 69.97                       | 60.85                       |
| 6          | 43.63                  | 34.89  | 15.71  | 83.46                   | 83.12                       | 75.95                       |
| 8          | 51.37                  | 41.38  | 22.92  | 86.75                   | 87.14                       | 81.26                       |
| 10         | 63.60                  | 45.94  | 28.82  | 90.06                   | 89.19                       | 85.27                       |
| 15         | 80.98                  | 54.38  | 41.93  | 93.36                   | 91.25                       | 89.94                       |
| 20         | 86.20                  | 63.47  | 52.43  | 93.46                   | 93.97                       | 92.66                       |
| 30         | 93.35                  | 73.22  | 66.87  | 96.13                   | 96.03                       | 96.68                       |
| 40         | 95.37                  | 82.98  | 76.09  | 96.88                   | 96.14                       | 96.79                       |
| 50         | 96.12                  | 87.58  | 83.37  | 97.63                   | 96.90                       | 98.20                       |
| 60         | 96.87                  | 91.55  | 88.03  | 99.02                   | 97.66                       | 98.96                       |
| 75         | 97.61                  | 95.52  | 94.01  | 99.13                   | 97.77                       | 99.73                       |
| 90         | 98.36                  | 96.92  | 97.38  | 98.59                   | 96.57                       | 98.53                       |
| 105        | 98.47                  | 98.96  | 100.11 | 99.98                   | 98.63                       | 99.94                       |

|            | ET/SiO <sub>2</sub> /TM | ET:GLU/SiO <sub>2</sub> /TM | ET:EMA/SiO <sub>2</sub> /TM | ET/SiO <sub>2</sub> /BM | ET:GLU/SiO <sub>2</sub> /BM | ET:EMA/SiO <sub>2</sub> /BM |
|------------|-------------------------|-----------------------------|-----------------------------|-------------------------|-----------------------------|-----------------------------|
| Time (min) | Cumulative release (%)  |                             |                             |                         |                             |                             |
| 0          | 0                       | 0                           | 0                           | 0                       | 0                           | 0                           |
| 1          | 7.69                    | 10.87                       | 31.34                       | 12.14                   | 21.68                       | 35.42                       |
| 2          | 13.09                   | 19.58                       | 47.05                       | 39.30                   | 37.79                       | 40.32                       |
| 4          | 21.56                   | 27.57                       | 53.07                       | 54.34                   | 46.92                       | 45.22                       |
| 6          | 38.51                   | 32.67                       | 55.37                       | 59.40                   | 51.87                       | 49.44                       |
| 8          | 46.24                   | 37.06                       | 56.92                       | 62.33                   | 53.32                       | 51.58                       |
| 10         | 57.83                   | 42.90                       | 60.72                       | 62.40                   | 57.58                       | 55.11                       |
| 15         | 64.82                   | 49.46                       | 65.26                       | 67.46                   | 61.14                       | 59.33                       |
| 20         | 71.82                   | 56.04                       | 67.57                       | 70.40                   | 65.40                       | 63.57                       |
| 30         | 77.28                   | 61.90                       | 75.11                       | 75.47                   | 71.77                       | 68.50                       |
| 40         | 78.90                   | 66.32                       | 81.16                       | 77.70                   | 75.34                       | 73.44                       |
| 50         | 80.53                   | 71.46                       | 85.73                       | 81.36                   | 78.22                       | 76.99                       |
| 60         | 81.39                   | 75.89                       | 89.56                       | 82.16                   | 81.11                       | 79.16                       |
| 75         | 80.71                   | 81.05                       | 93.39                       | 84.39                   | 82.59                       | 83.41                       |
| 90         | 80.80                   | 87.66                       | 98.71                       | 85.92                   | 86.88                       | 85.59                       |
| 105        | 80.89                   | 92.83                       | 100.32                      | 87.44                   | 89.07                       | 88.46                       |

**Table S2.** Cumulative release (%) of ET for all analyzed samples (simulated gastric fluid without pepsin (SGFsp), pH 1.2).

|            | ET                     | ET:GLU | ET:EMA | ET:SiO <sub>2</sub> /MM | ET:GLU/SiO <sub>2</sub> /MM | ET:EMA/SiO <sub>2</sub> /MM |
|------------|------------------------|--------|--------|-------------------------|-----------------------------|-----------------------------|
| Time (min) | Cumulative release (%) |        |        |                         |                             |                             |
| 0          | 0                      | 0      | 0      | 0                       | 0                           | 0                           |
| 1          | 0.90                   | 6.06   | 2.84   | 2.06                    | 9.78                        | 6.18                        |
| 2          | 2.67                   | 11.22  | 6.28   | 35.30                   | 29.50                       | 17.19                       |
| 4          | 9.46                   | 22.70  | 18.18  | 56.82                   | 55.03                       | 35.25                       |
| 6          | 18.49                  | 33.49  | 25.10  | 81.08                   | 74.86                       | 44.75                       |
| 8          | 27.12                  | 40.22  | 29.12  | 86.09                   | 84.62                       | 54.38                       |
| 10         | 36.44                  | 48.08  | 36.90  | 90.08                   | 92.65                       | 65.93                       |
| 15         | 57.00                  | 56.20  | 47.91  | 91.39                   | 93.79                       | 83.86                       |
| 20         | 70.20                  | 65.21  | 56.72  | 94.06                   | 94.67                       | 92.85                       |
| 30         | 86.39                  | 77.67  | 69.98  | 95.97                   | 96.09                       | 95.90                       |
| 40         | 91.87                  | 84.25  | 78.67  | 97.83                   | 96.38                       | 99.50                       |
| 50         | 91.39                  | 88.88  | 86.69  | 97.75                   | 98.44                       | 98.98                       |
| 60         | 93.22                  | 91.85  | 91.94  | 97.27                   | 97.32                       | 98.77                       |
| 75         | 93.26                  | 95.40  | 95.47  | 99.07                   | 98.20                       | 99.45                       |
| 90         | 96.33                  | 98.31  | 99.38  | 99.39                   | 99.17                       | 99.71                       |
| 105        | 96.00                  | 97.49  | 99.38  | 99.35                   | 98.27                       | 98.81                       |

|            | ET/SiO <sub>2</sub> /TM | ET:GLU/SiO <sub>2</sub> /TM | ET:EMA/SiO <sub>2</sub> /TM | ET/SiO <sub>2</sub> /BM | ET:GLU/SiO <sub>2</sub> /BM | ET:EMA/SiO <sub>2</sub> /BM |
|------------|-------------------------|-----------------------------|-----------------------------|-------------------------|-----------------------------|-----------------------------|
| Time (min) | Cumulative release (%)  |                             |                             |                         |                             |                             |
| 0          | 0                       | 0                           | 0                           | 0                       | 0                           | 0                           |
| 1          | 16.19                   | 18.72                       | 43.88                       | 7.02                    | 20.13                       | 24.08                       |
| 2          | 28.57                   | 24.77                       | 54.76                       | 39.25                   | 27.91                       | 36.35                       |
| 4          | 45.03                   | 28.80                       | 60.19                       | 59.28                   | 36.03                       | 46.51                       |
| 6          | 51.22                   | 34.87                       | 64.40                       | 63.02                   | 41.22                       | 53.02                       |
| 8          | 54.72                   | 37.30                       | 64.92                       | 65.98                   | 46.92                       | 57.96                       |
| 10         | 57.04                   | 40.88                       | 68.22                       | 67.59                   | 50.66                       | 60.09                       |
| 15         | 62.27                   | 45.63                       | 74.50                       | 73.21                   | 59.26                       | 69.50                       |
| 20         | 67.37                   | 51.61                       | 77.67                       | 76.31                   | 64.07                       | 72.60                       |
| 30         | 70.88                   | 62.80                       | 84.88                       | 81.09                   | 70.90                       | 79.45                       |
| 40         | 75.34                   | 69.22                       | 88.52                       | 83.78                   | 76.57                       | 84.16                       |
| 50         | 81.37                   | 74.67                       | 91.18                       | 85.12                   | 80.28                       | 89.30                       |
| 60         | 84.59                   | 80.20                       | 94.25                       | 86.52                   | 84.63                       | 91.34                       |
| 75         | 85.85                   | 86.94                       | 94.62                       | 89.78                   | 87.30                       | 94.38                       |
| 90         | 86.69                   | 88.73                       | 97.84                       | 88.45                   | 91.26                       | 96.92                       |
| 105        | 87.24                   | 95.90                       | 97.87                       | 90.87                   | 93.50                       | 98.06                       |
